# Supplementary material for: Interfacial defect passivation via imidazolium bromide for efficient, stable perovskite solar cells
Source: Royal Society of Chemistry journal article supplement (doi:10.1039/d4ta01872a), 2024-01-01
Supplement: d4ta01872a1.pdf [file d4ta01872a1.pdf]

## Supporting Information

### **Interfacial defect passivation via imidazolium bromide for efficient, stable perovskite solar cells**

Zijing Chen,<sup>a,c</sup> Shiyu Jiang,<sup>a,c</sup> Zhenghao Liu,<sup>a,b</sup> Yiming Li,<sup>\*a</sup> Jiangjian Shi,<sup>a</sup> Huijue Wu,<sup>a</sup> Yanhong Luo,<sup>a,c,d</sup> Dongmei Li,<sup>\*a,c,d</sup> Qingbo Meng<sup>\*a,b,d</sup>

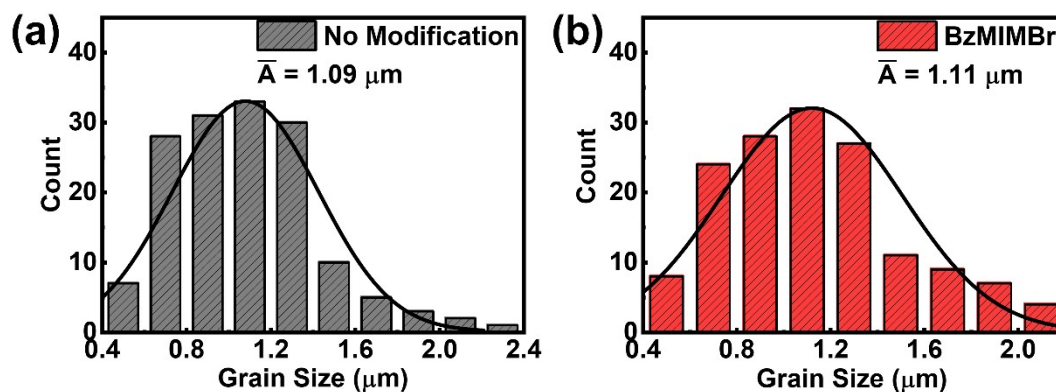

**Fig. S1.** The histogram distribution of grain sizes for (a) the perovskite film without modification and (b) the perovskite film with BzMIMBr.

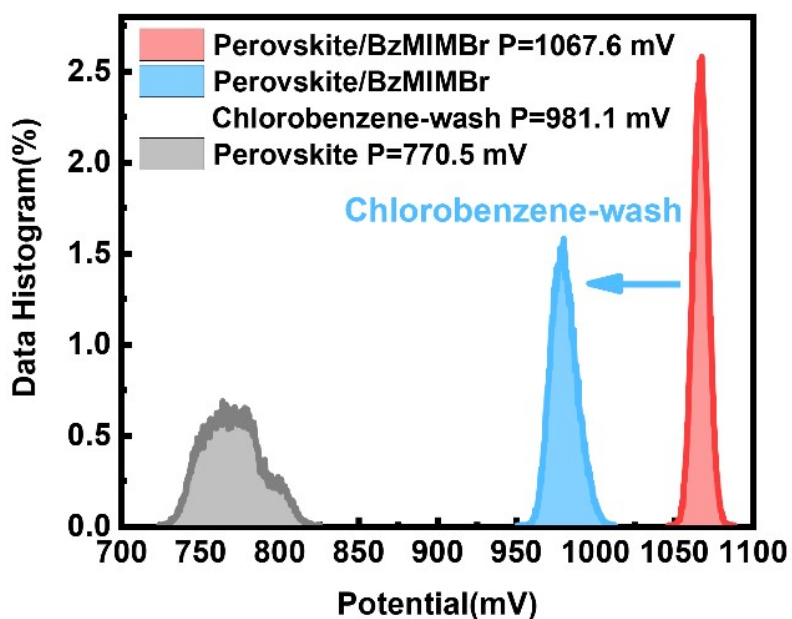

**Fig. S2.** Surface contacting potential difference (CPD) distributions for perovskite/BzMIMBr films after chlorobenzene washing treatment.

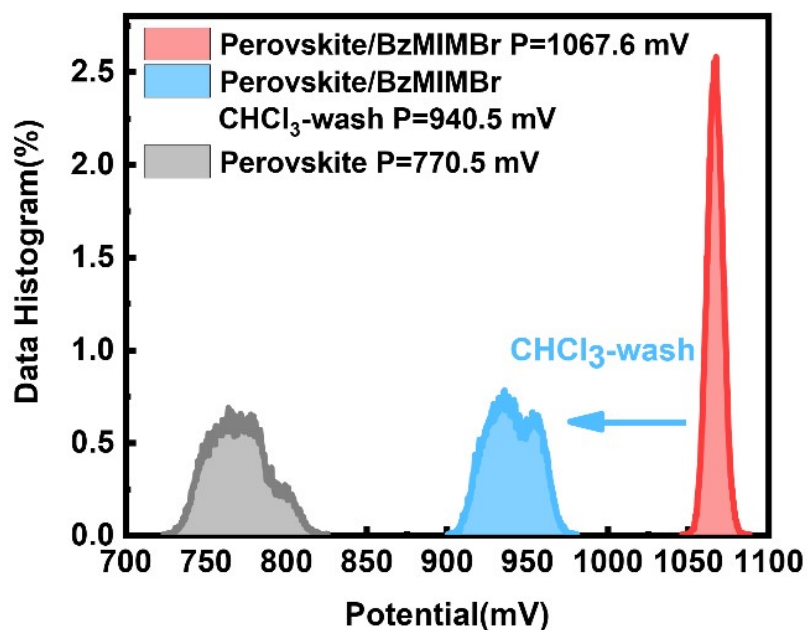

**Fig. S3.** Surface contacting potential difference (CPD) distributions for perovskite/BzMIMBr films after chloroform ( $\text{CHCl}_3$ ) washing treatment.

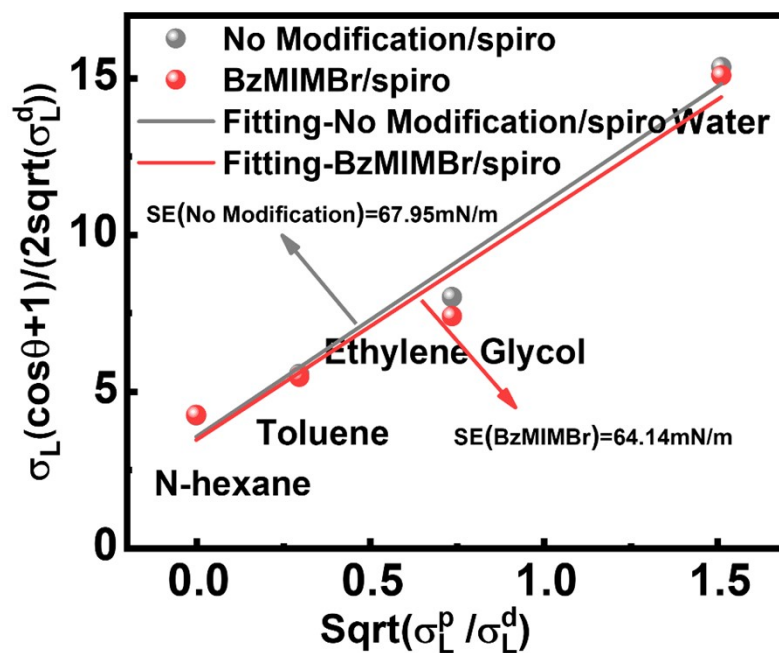

**Fig. S4.** Surface energy measurement of perovskite/spiro-OMeTAD films with/without BzMIMBr treatment using the OWRK method.

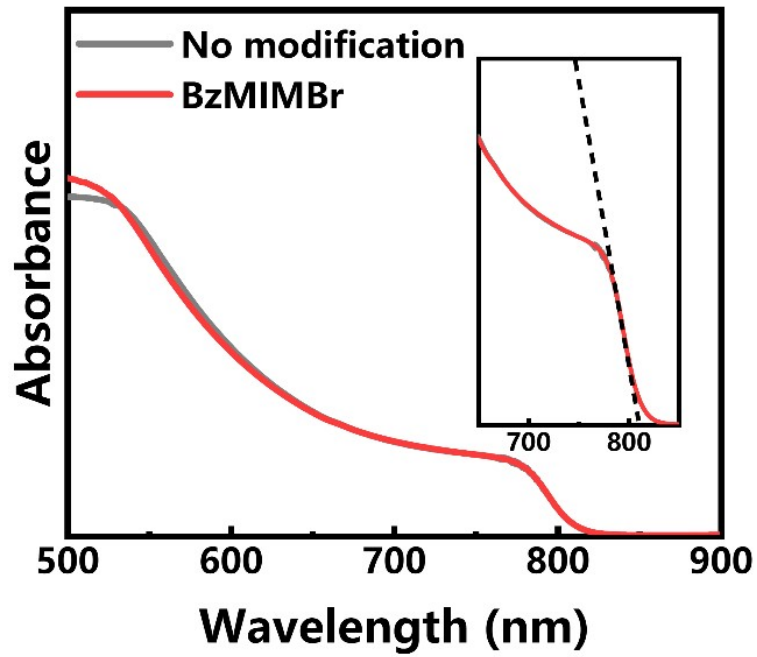

**Fig. S5.** UV-visible absorption spectra of perovskite films with/without BzMIMBr.

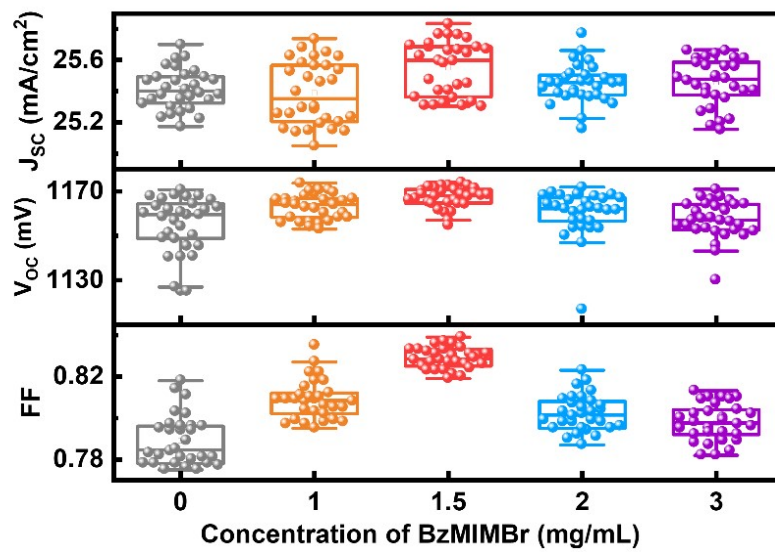

**Fig. S6.** Detailed performance parameters statistics of the cells modified by BzMIMBr with different concentration.

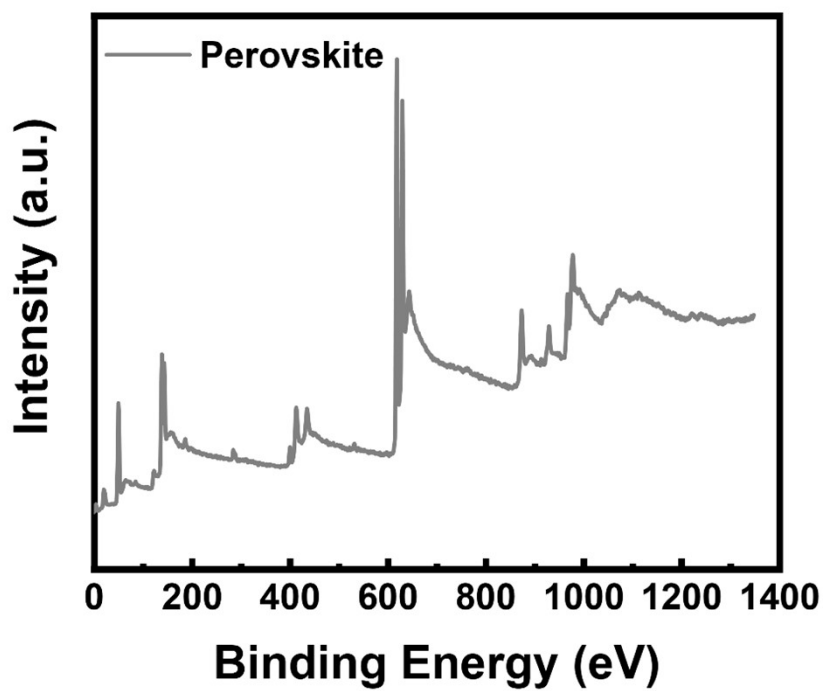

Fig. S7. XPS-spectra analysis in perovskite films without BzMIMBr.

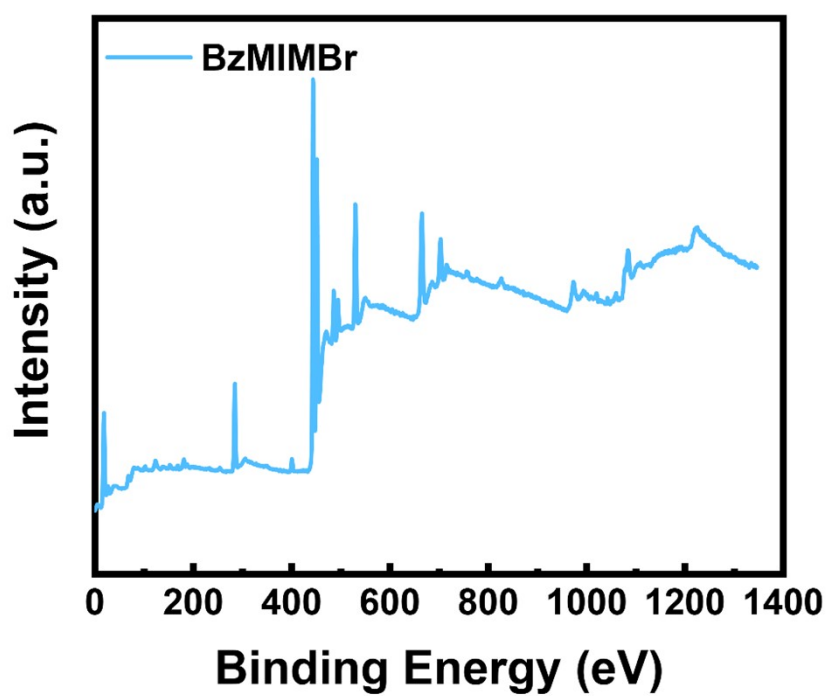

Fig. S8. XPS-spectra analysis in BzMIMBr films.

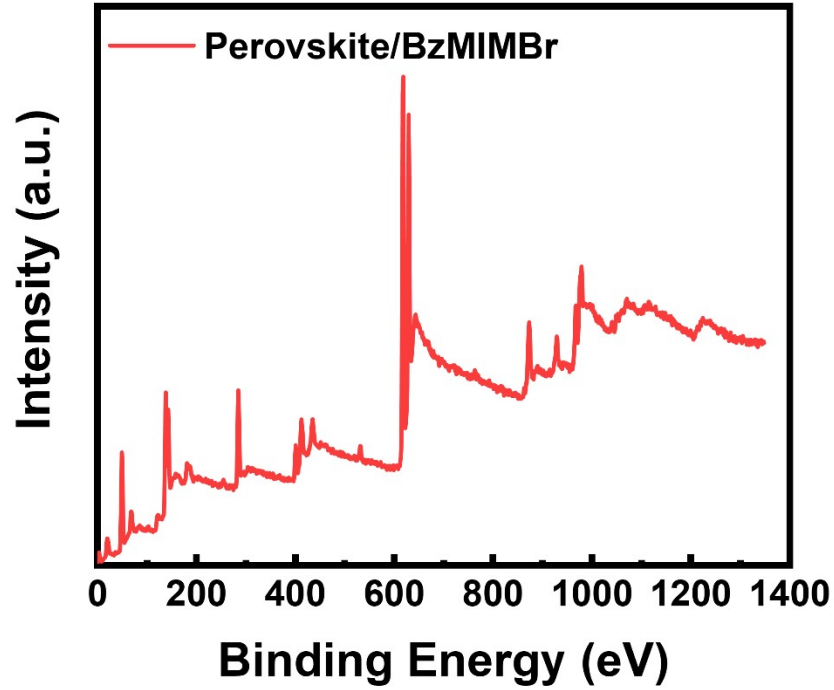

Fig. S9. XPS-spectra analysis in perovskite films with BzMIMBr.

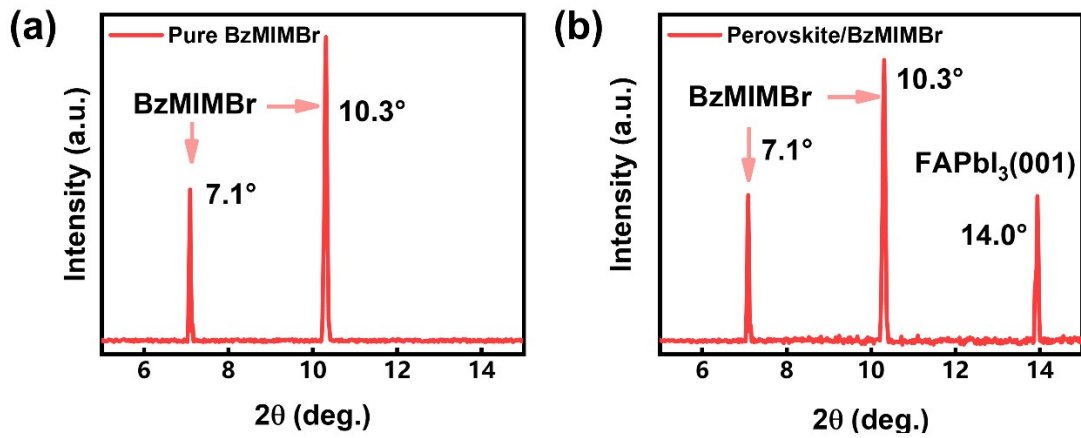

Fig. S10. XRD of (a) pure BzMIMBr; (b) perovskite films with excess BzMIMBr.

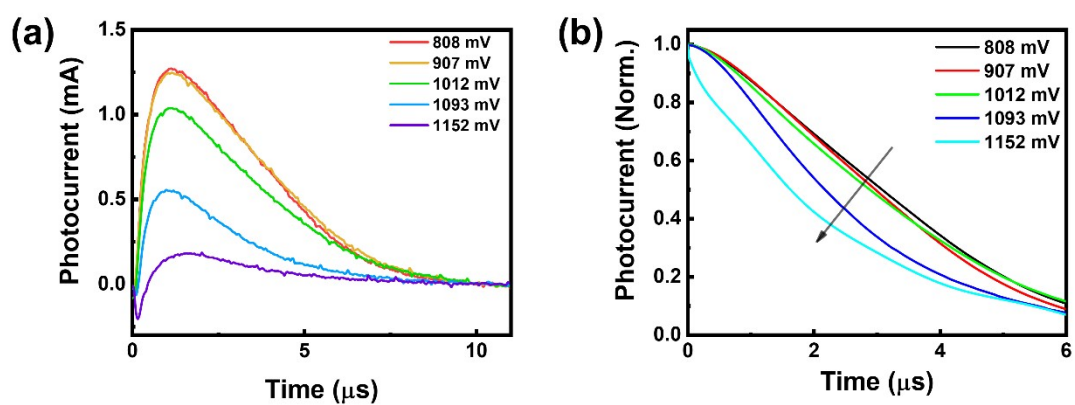

**Fig. S11.** (a) Bias-voltage-dependent TPC spectra of devices without BzMIMBr; (b) Normalized bias-voltage-dependent TPC spectra of devices without BzMIMBr.

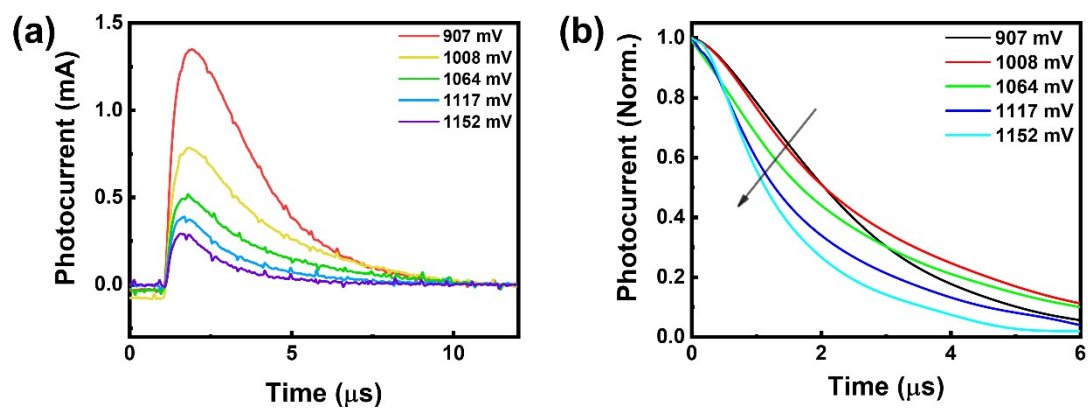

**Fig. S12.** (a) Bias-voltage-dependent TPC spectra of devices with BzMIMBr; (b) Normalized bias-voltage-dependent TPC spectra of devices with BzMIMBr.

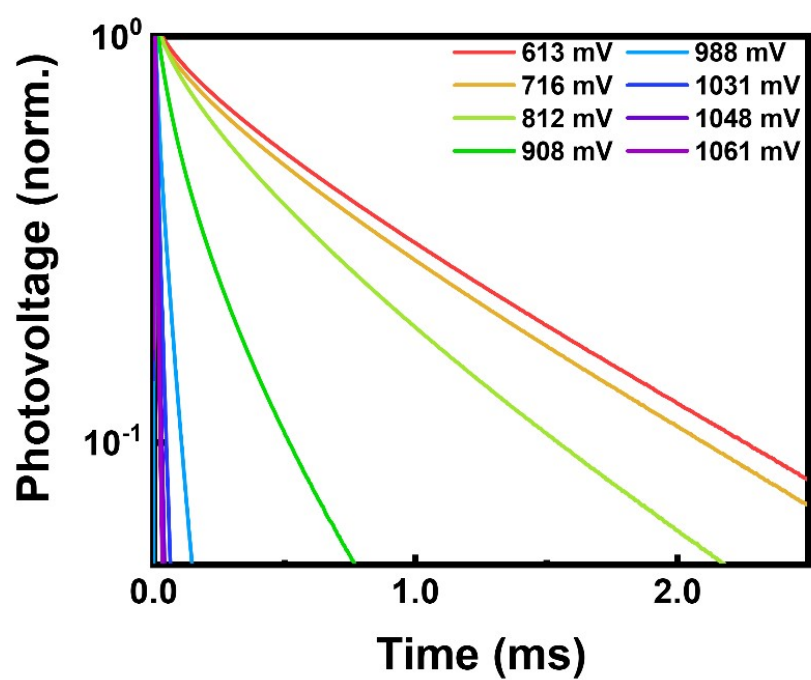

Fig. S13. Bias-voltage-dependent TPV spectra of devices without BzMIMBr.

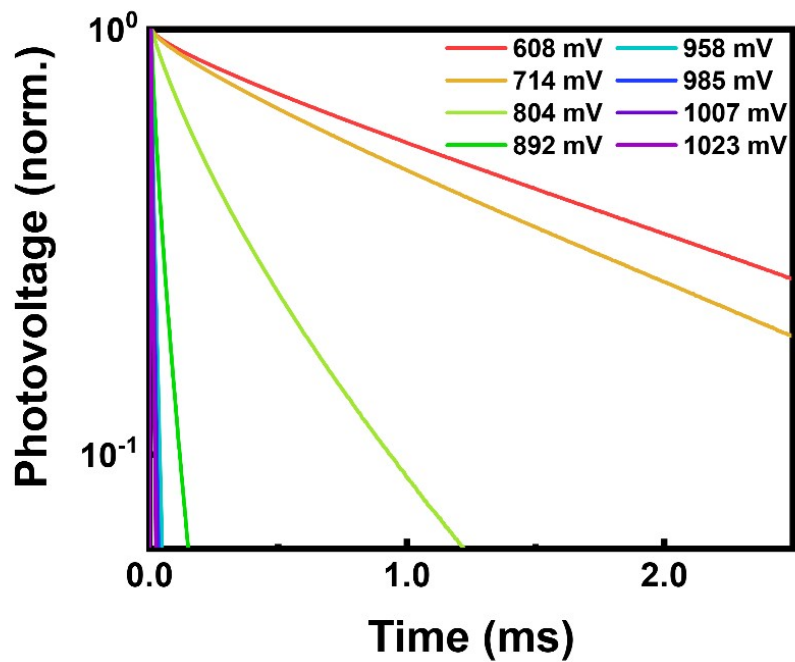

Fig. S14. Bias-voltage-dependent TPV spectra of devices with BzMIMBr.



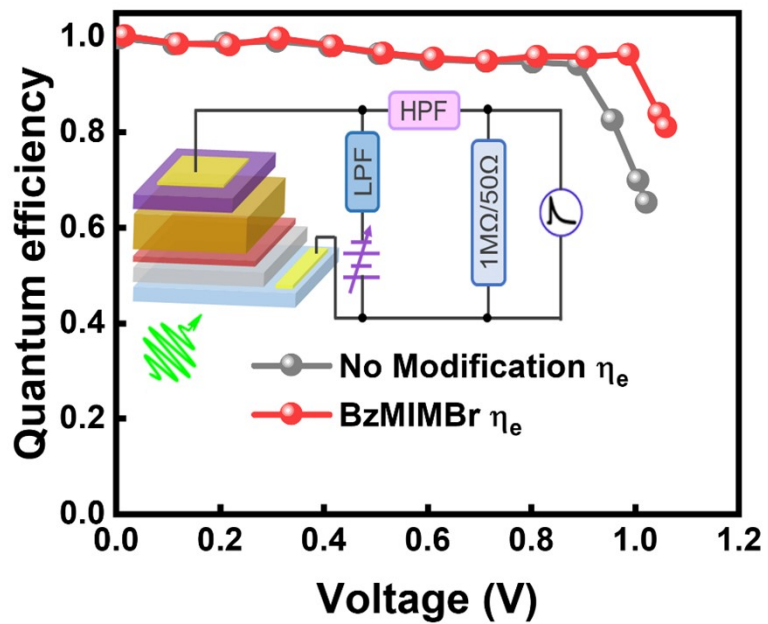

**Fig. S15** Charge extraction efficiency ( $\eta_e$ ) of the cells measured from modulated electrical transient measurements.
